# Supplementary material
Source: PubMed Central journal article supplement (PMC7240083)
Supplement: IAI.00851-19-s0002.pdf [file IAI.00851-19-s0002.pdf]

Figure S2

A

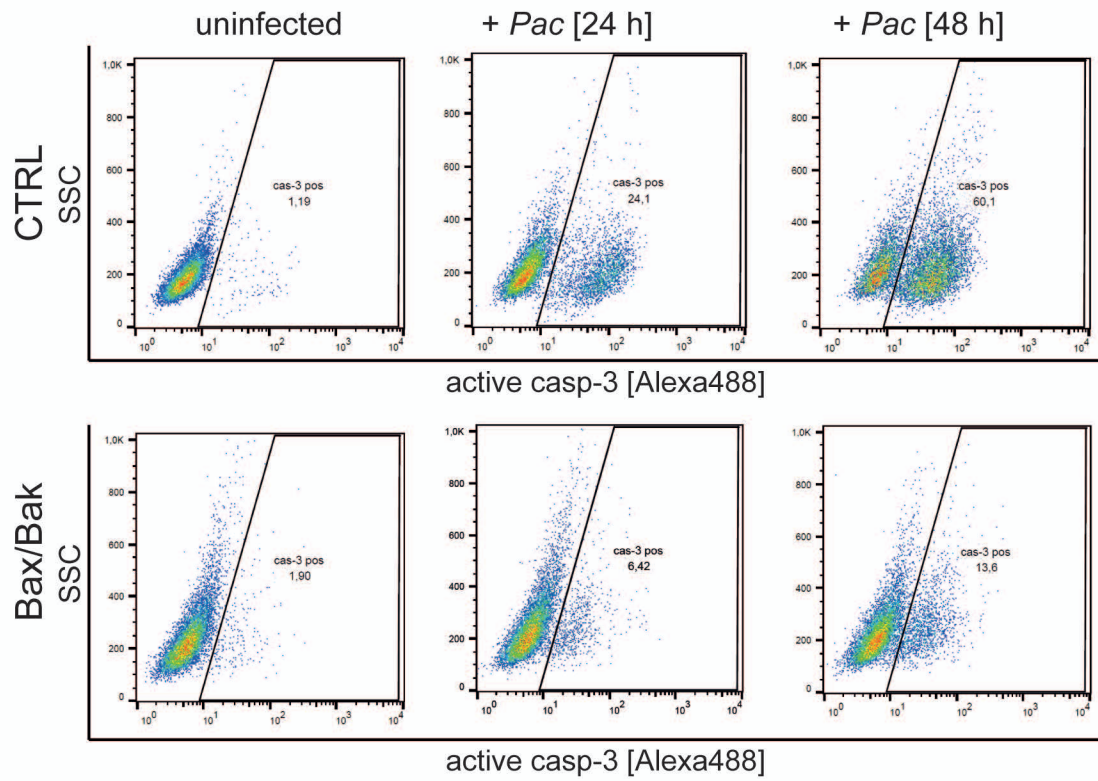

B

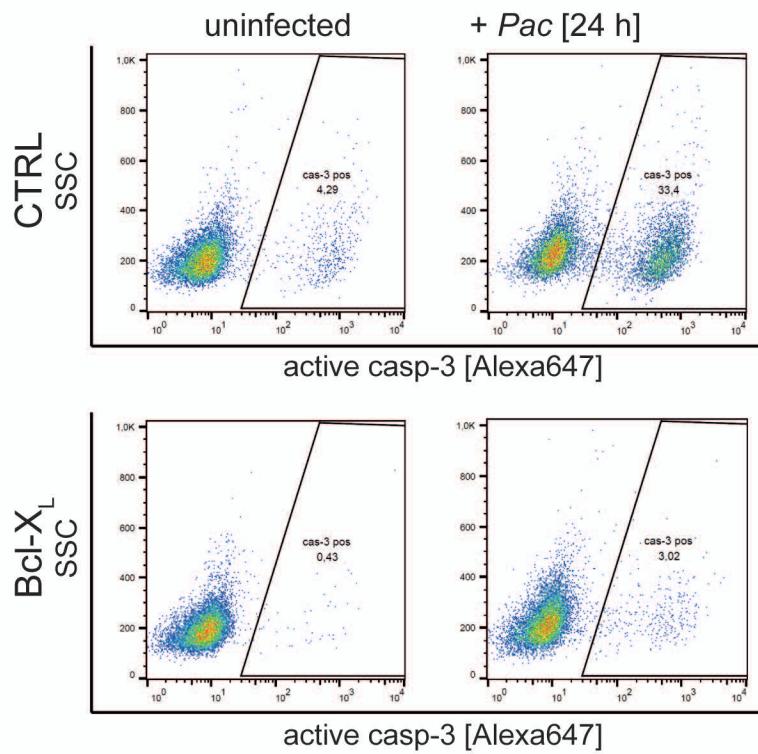

C

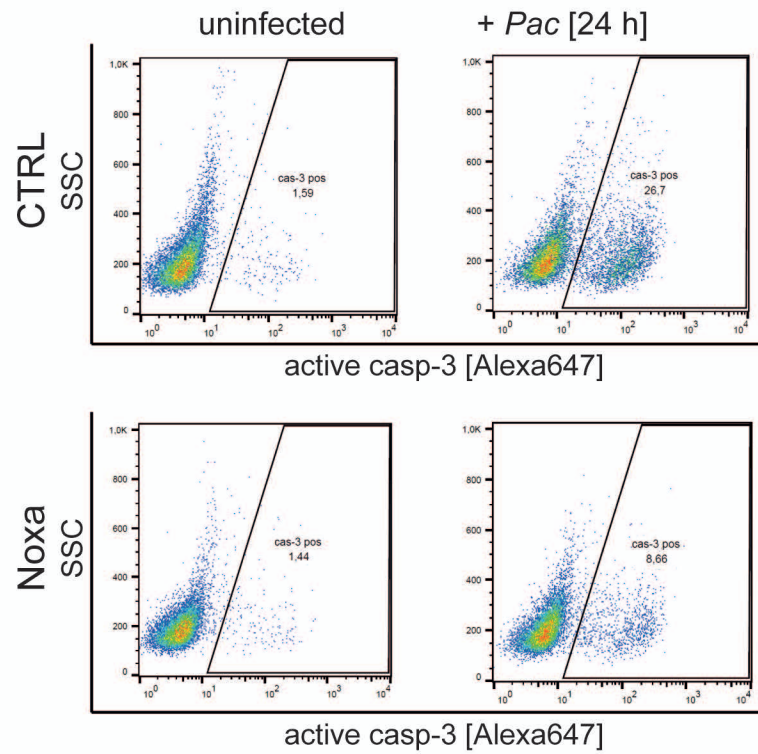

**Fig. S2** *Detection of active caspase-3 by flow cytometry.*

HeLa cells of the indicated genotype were infected with *Pac* (MOI=25) and analyzed after 24 h and 48 h for caspase-3 activation by intracellular staining and flow cytometry. **A**, CTRL and Bax/Bak-deficient cells (24 h and 48 h); **B**, CTRL and Bcl-X<sub>L</sub>-overexpressing cells (24 h); **C**, CTRL and Noxa-deficient cells (24 h).
