# Supplementary material
Source: PubMed Central journal article supplement (PMC7240083)
Supplement: IAI.00851-19-s0003.pdf [file IAI.00851-19-s0003.pdf]

Figure S3

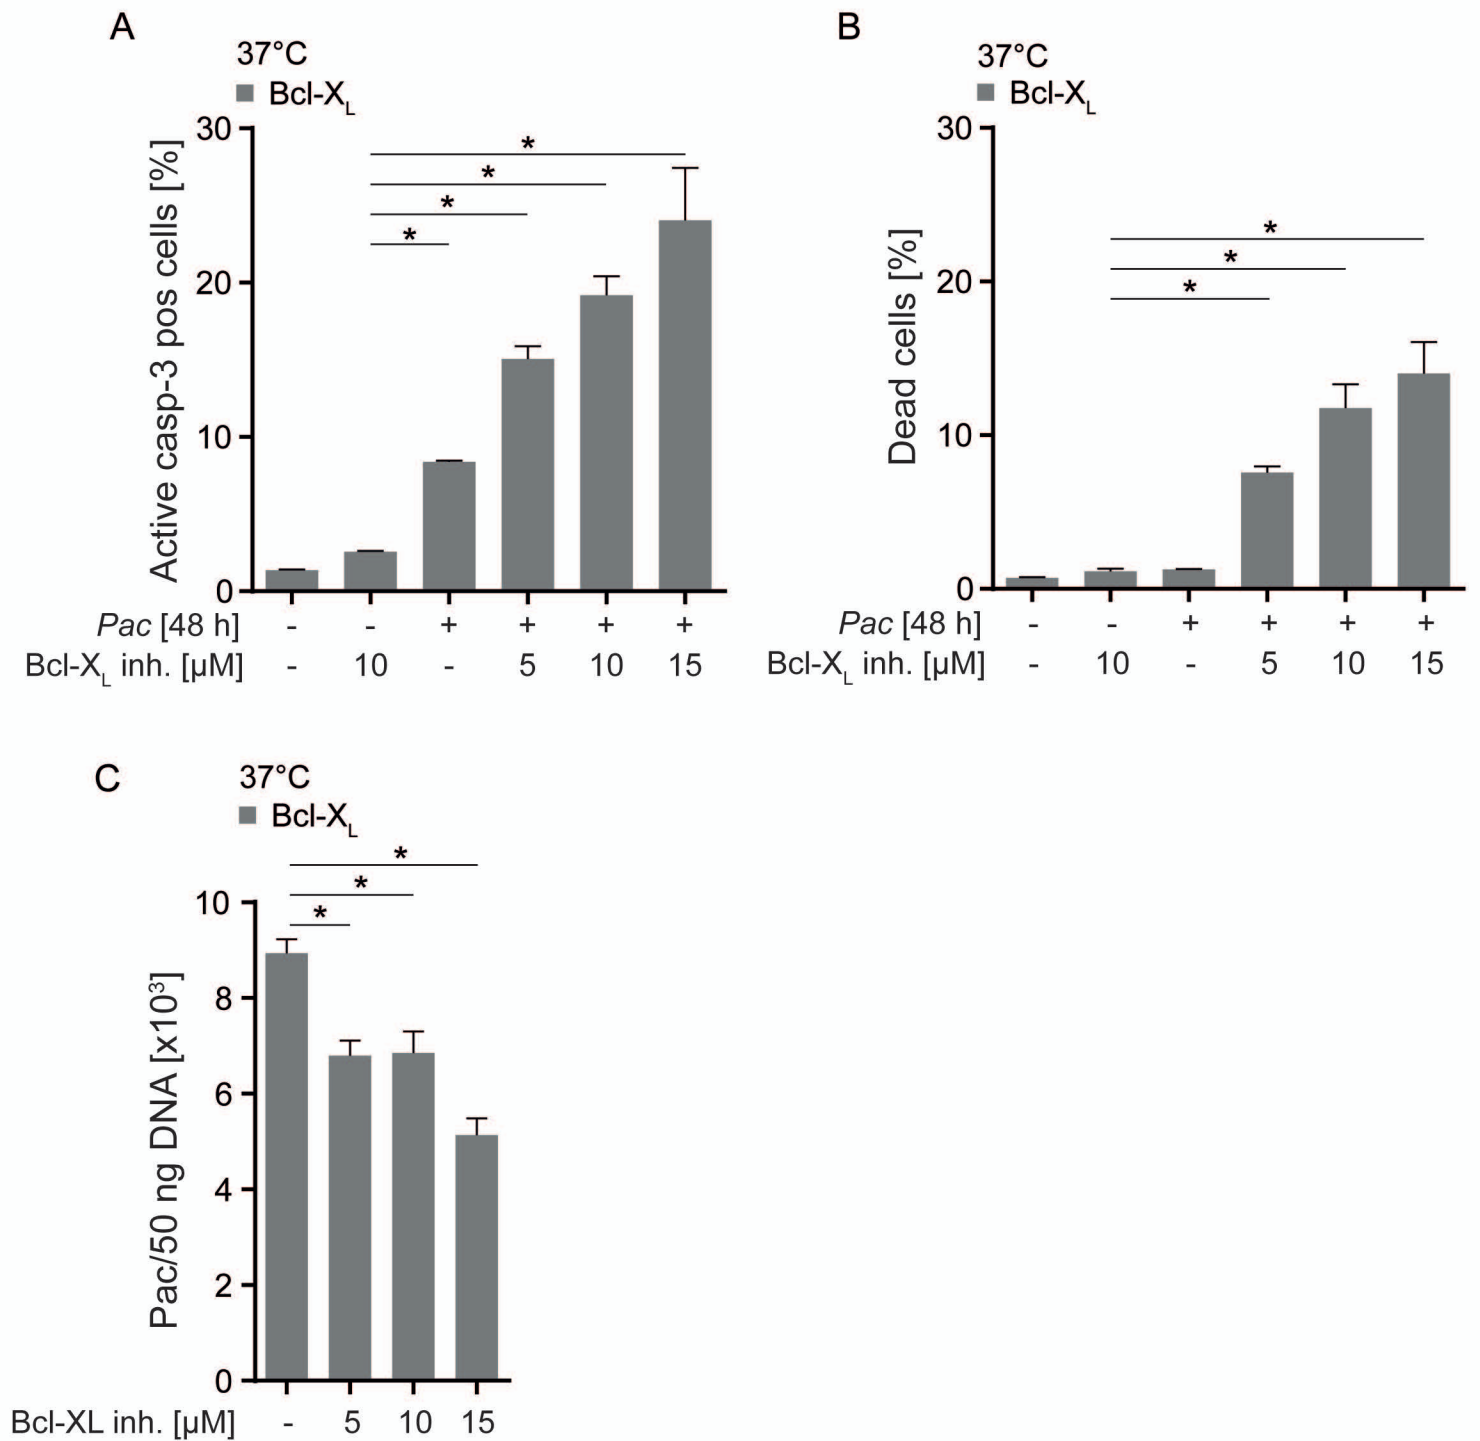

**Fig. S3** *Inhibition of Bcl-XL in Bcl-XL-over-expressing cells reverts apoptosis inhibition by and reduces growth of Pac.*

Bcl-X<sub>L</sub>-overexpressing HeLa cells were infected with *Pac* (MOI=25, 48 h) in absence or presence of Bcl-X<sub>L</sub>-inhibitor A-1155463 (5 to 15 μM, added at 24 h p.i.) and analyzed for caspase-3 activation (**A**) and cell death (**B**). **C**, DNA was isolated 24 or 48 h p.i. and quantified by qPCR. Detectable *Pac* genomic DNA-equivalents per 50 ng of total DNA isolated from each culture are shown. In addition, the presence of the human HPRT-gene was quantified in the DNA-samples showing very little variation from the DNA-measurements (see Fig. S8). Data are means/SEM of at least three independent experiments. \*, p<0.05 (paired two tailed t-test).
