# Supplementary material
Source: PubMed Central journal article supplement (PMC7240083)
Supplement: IAI.00851-19-s0004.pdf [file IAI.00851-19-s0004.pdf]

Figure S4

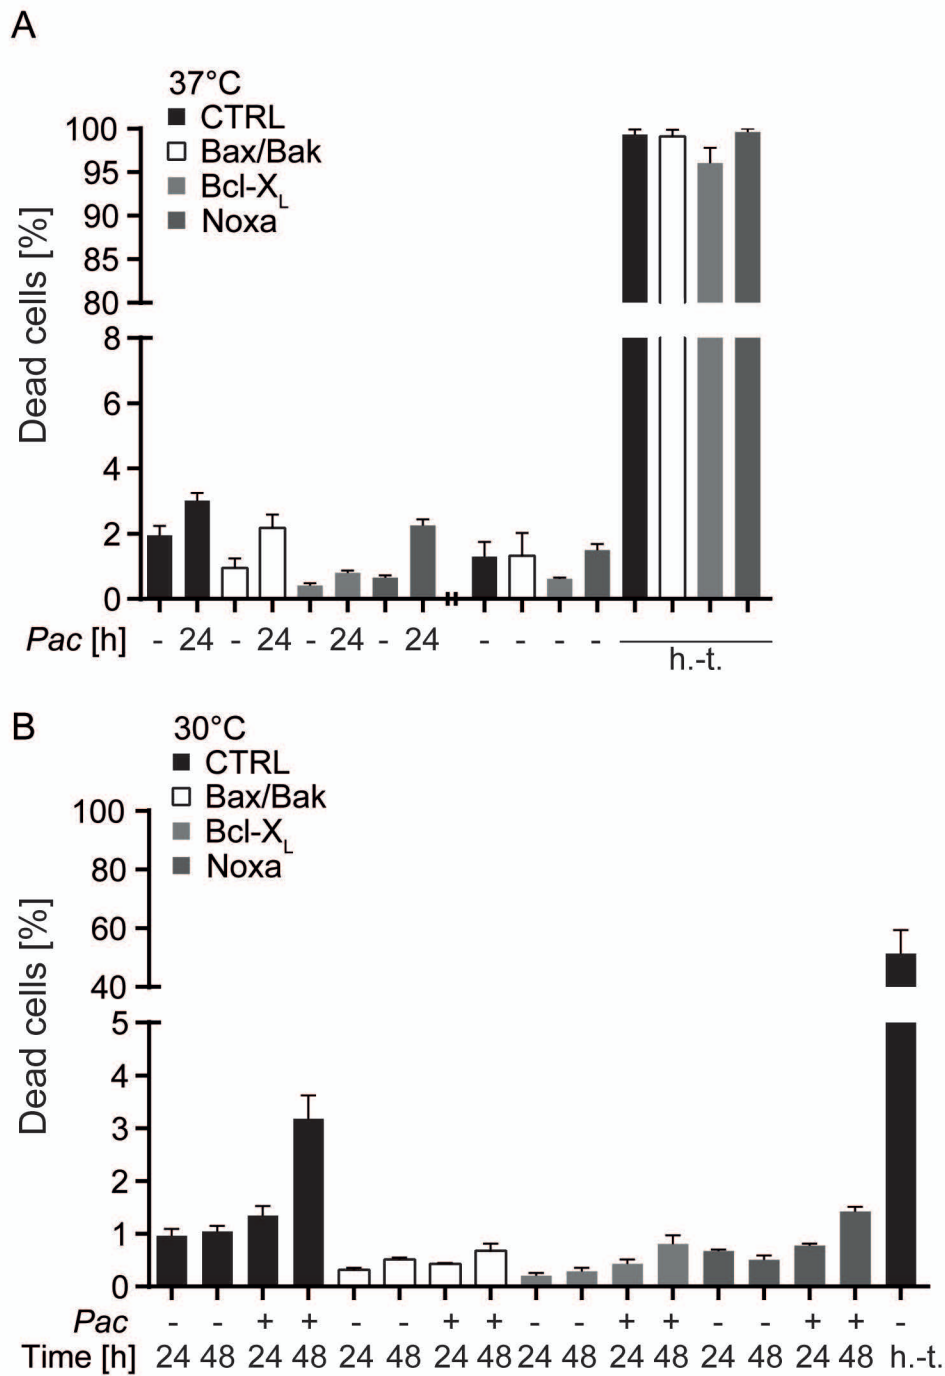

**Fig. S4** Cell death during Pac infection.

CTRL and mutant cell lines (Bax/Bak- or Noxa-deficient, Bcl-X<sub>L</sub>-overexpressing) were infected with *Pac* (24 or 48 at 37°C (A) or 30°C (B)) and stained with a Live/Dead stain to determine percentage of dead cells in the population. MOI was in all experiments 25. h.-t., heat-treated (1 min at 95°C).

Data are means/SEM of at least three independent experiments.
