# Supplementary material
Source: PubMed Central journal article supplement (PMC7240083)
Supplement: IAI.00851-19-s0006.pdf [file IAI.00851-19-s0006.pdf]

Figure S6

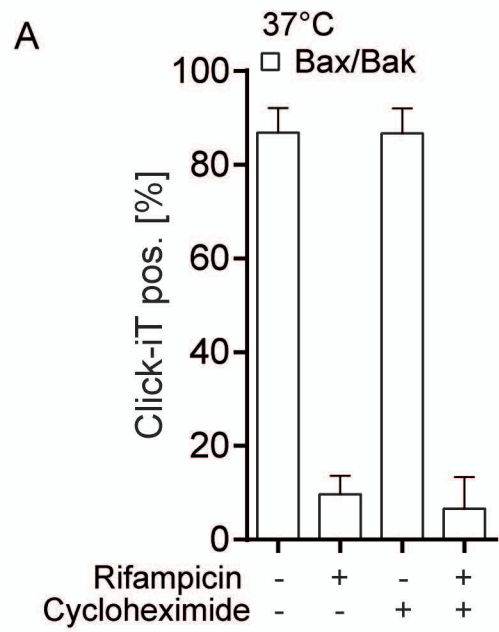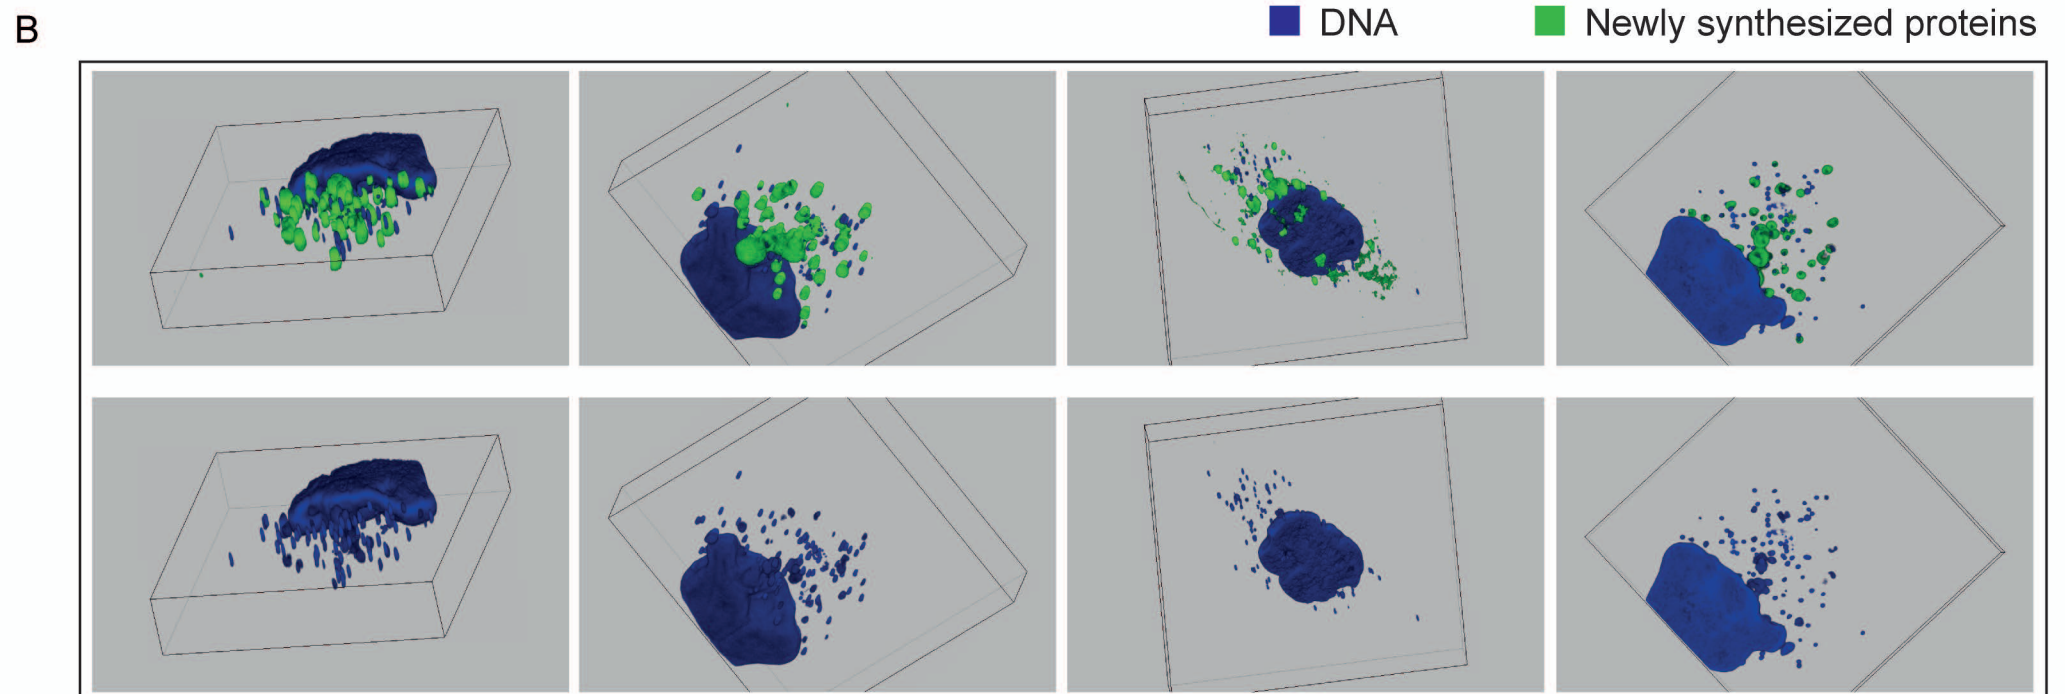

**Fig. S6**      *Protein synthesis in Pac-infected Bax/Bak-deficient HeLa cells*

HeLa cells deficient in Bax and Bak were infected with *Pac* (MOI=25) and analyzed 48 h p.i.. Cells were labelled with AHA at 47 h p.i. for one h, and newly synthesized proteins were detected using a Click-iT reaction. **A**, percentage of cells with positive bacterial Click-iT staining per total number of infected cells was calculated (pictures as shown in Fig. 3 were used for calculation). **B**, confocal microscopy was used to take z-stack pictures of the cell. The Click-iT-reaction products are shown in green, blue gives a Hoechst-33342 counter-stain to visualize bacterial and host DNA. Top and bottom show the same cells. In the top panel, newly synthesized proteins are shown as the Click-iT-signal in green.
