# Supplementary material
Source: PubMed Central journal article supplement (PMC7240083)
Supplement: IAI.00851-19-s0007.pdf [file IAI.00851-19-s0007.pdf]

Figure S7

■ DNA

■ Newly synthesized proteins

Rifampicin  
Cycloheximide

-

+

-

+

-

-

+

+

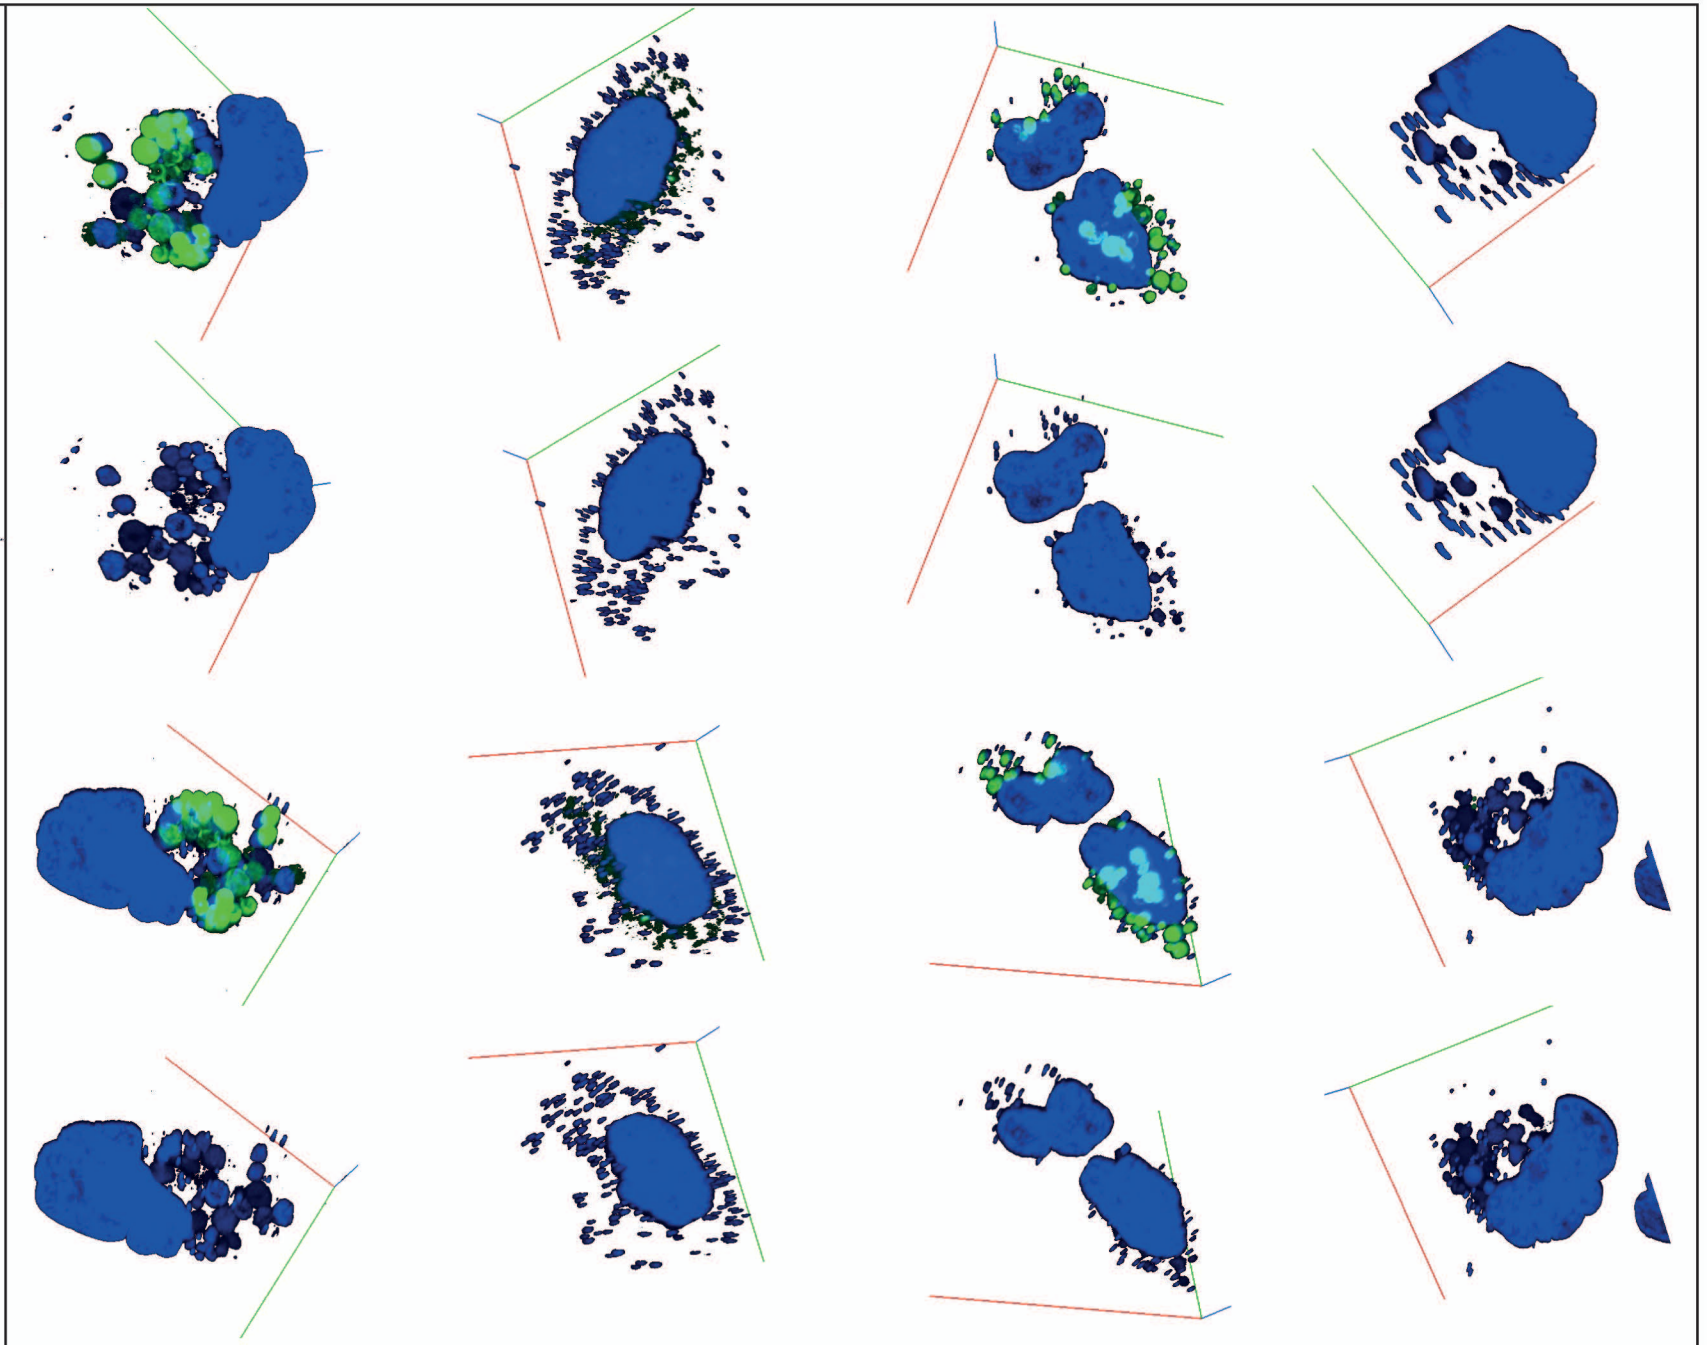

**Fig. S7** *Protein synthesis in Pac-infected Bax/Bak-deficient HeLa cells in presence and absence of rifampicin and cycloheximide*

*Pac*-infected and Click-iT stained Bax/Bak-deficient HeLa cells treated with rifampicin and/or cycloheximide (already shown in Fig. 3) were visualized by confocal microscopy. Z-stack pictures of the cell were taken to generate 3D images. The Click-iT-reaction products are shown in green, blue gives a Hoechst-33342 counter-stain to visualize bacterial and host DNA.
