# Supplementary material
Source: PubMed Central journal article supplement (PMC7240083)
Supplement: IAI.00851-19-s0009.pdf [file IAI.00851-19-s0009.pdf]

Figure S9

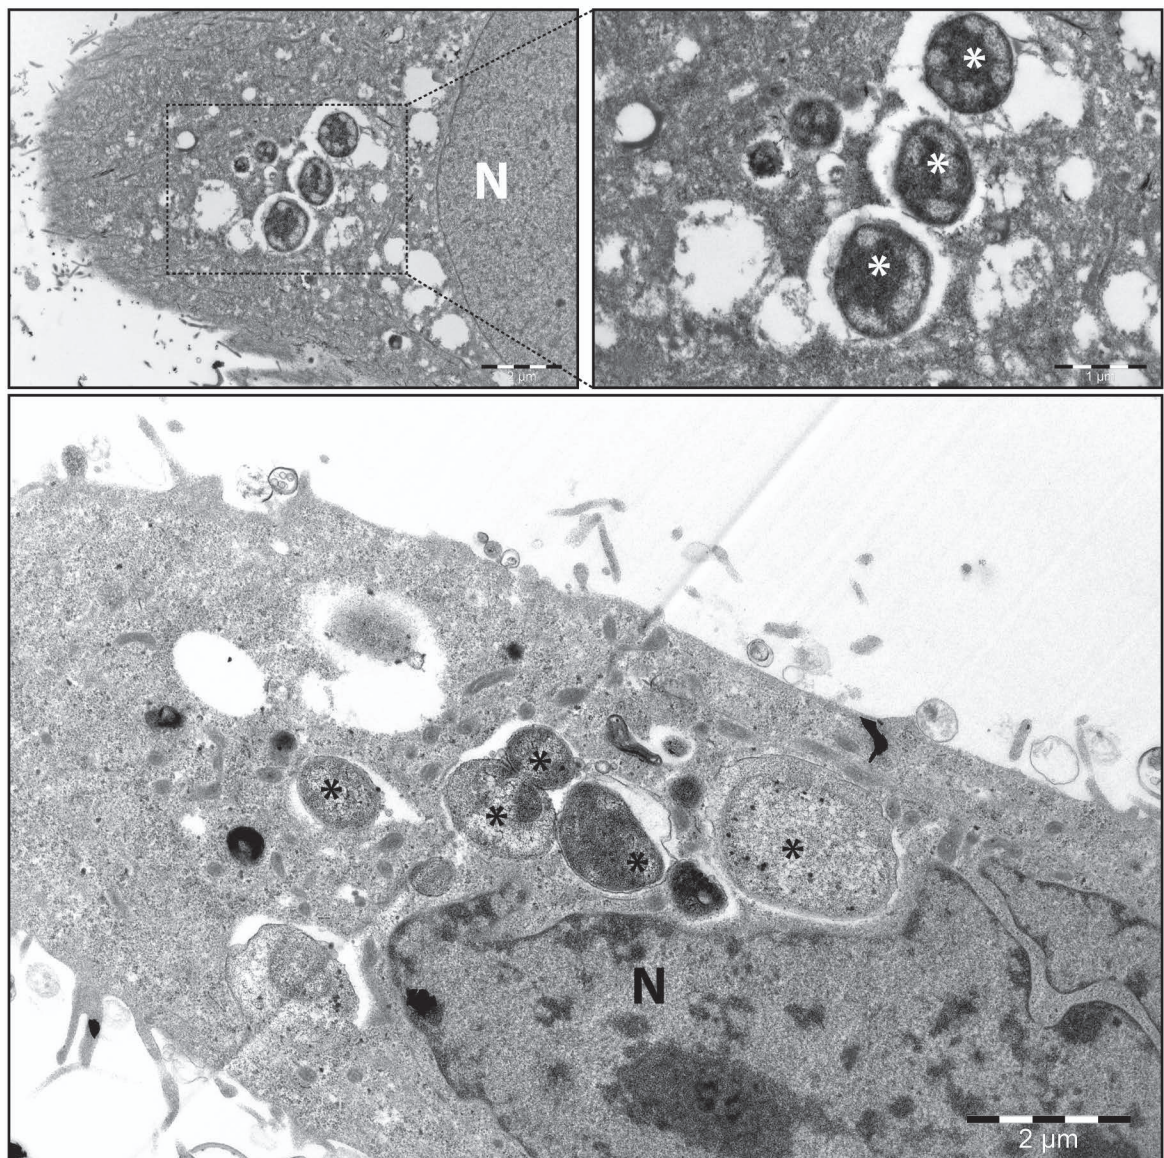

**Fig. S9** *Electronic microscopy pictures to detect reticular bodies (RBs).*

Bax/Bak-deficient HeLa cells were infected with *Pac* (MOI=25) for 24 h, fixed and analyzed by electron microscopy. Asterisks indicate RBs. N=Nucleus. Scale bars, 2 μm (upper-left and below) or 1 μm (upper-right).
